# Supplementary material
Source: PubMed Central journal article supplement (PMC3094170)

# Supplemental Figure S1

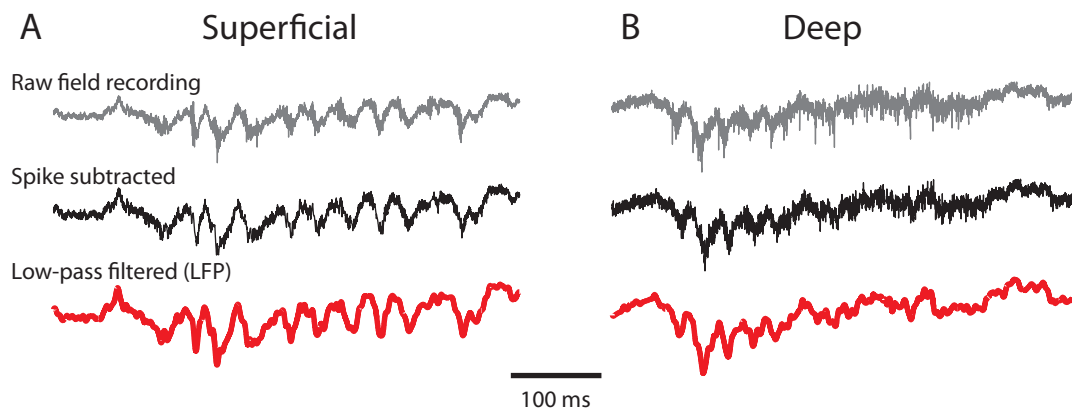

Supplement: supp_00965.2010_figS1.pdf [file supp_00965.2010_figS1.pdf]

# Supplemental Figure S2

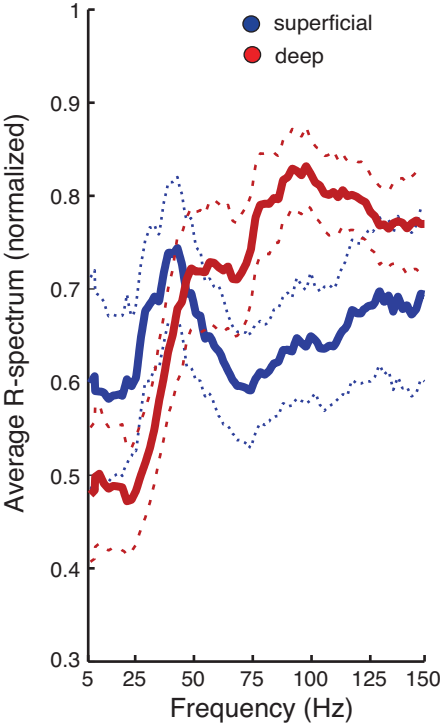

Supplement: supp_00965.2010_figS2.pdf [file supp_00965.2010_figS2.pdf]

# Supplemental Figure S3

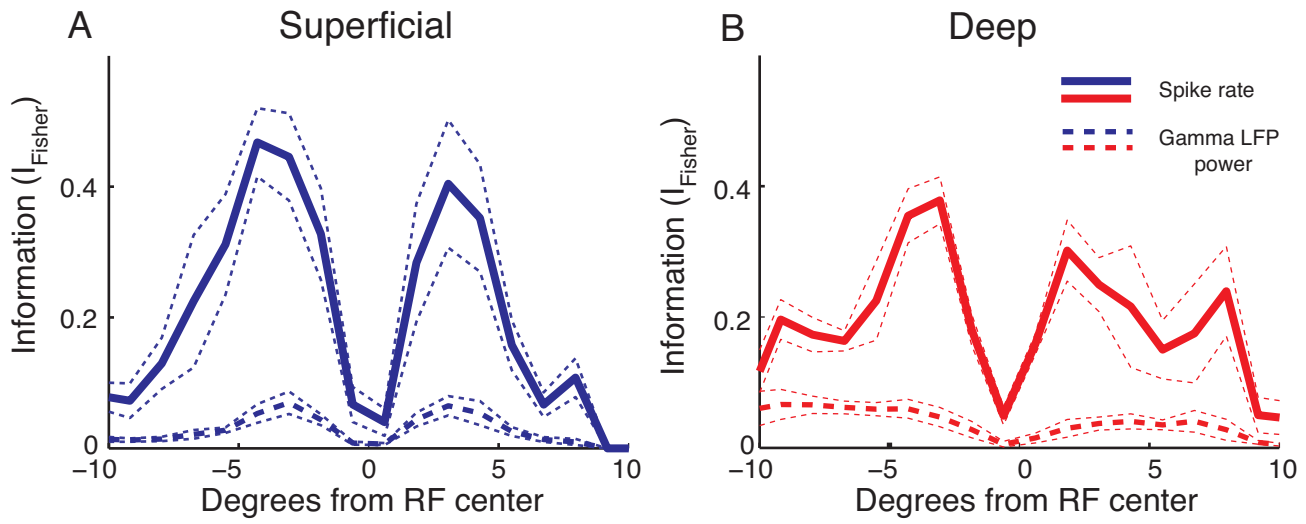

Supplement: supp_00965.2010_figS3.pdf [file supp_00965.2010_figS3.pdf]

# Supplemental Figure S4

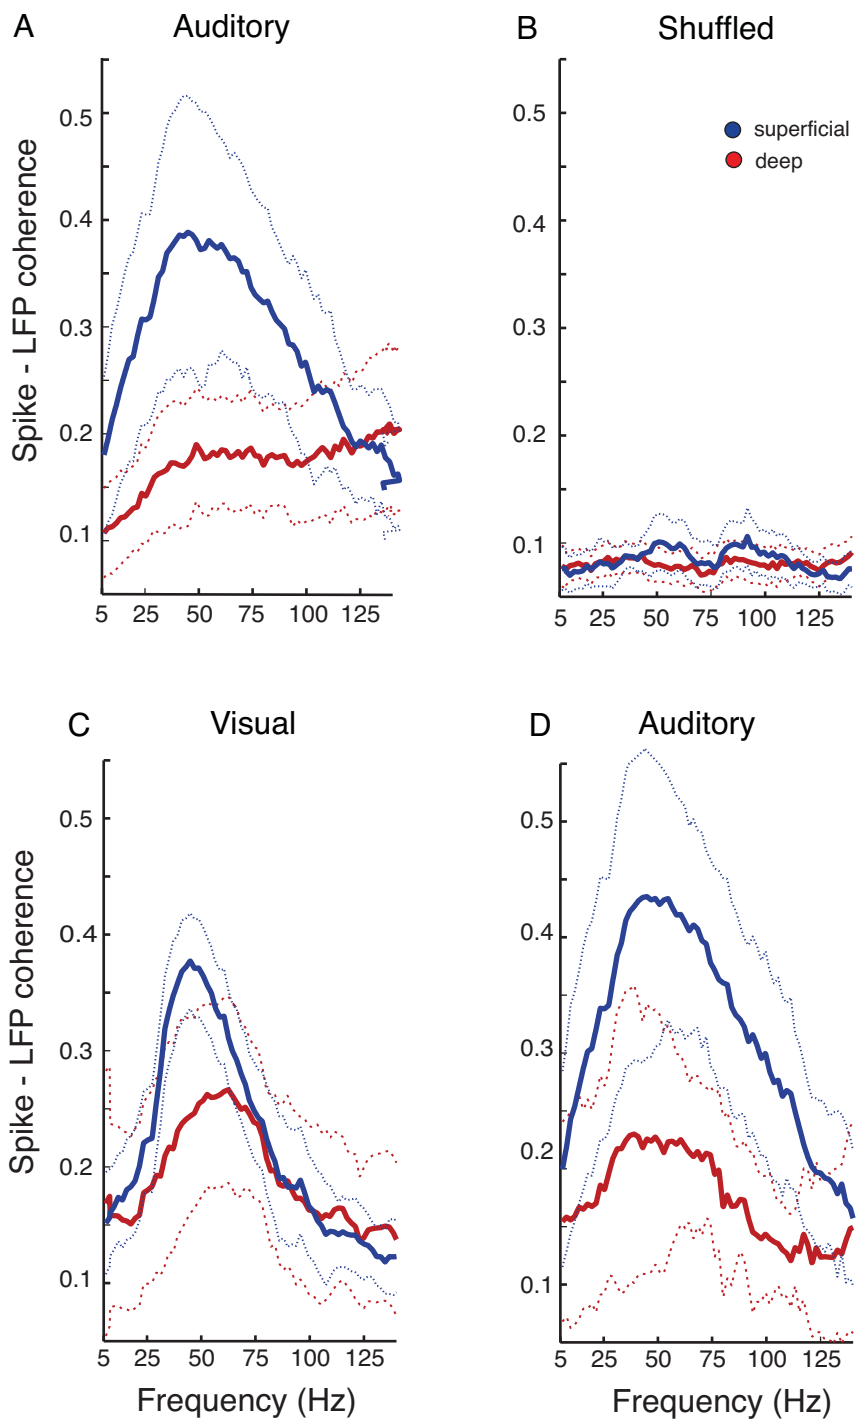

Supplement: supp_00965.2010_figS4.pdf [file supp_00965.2010_figS4.pdf]

# Supplemental Figure S5

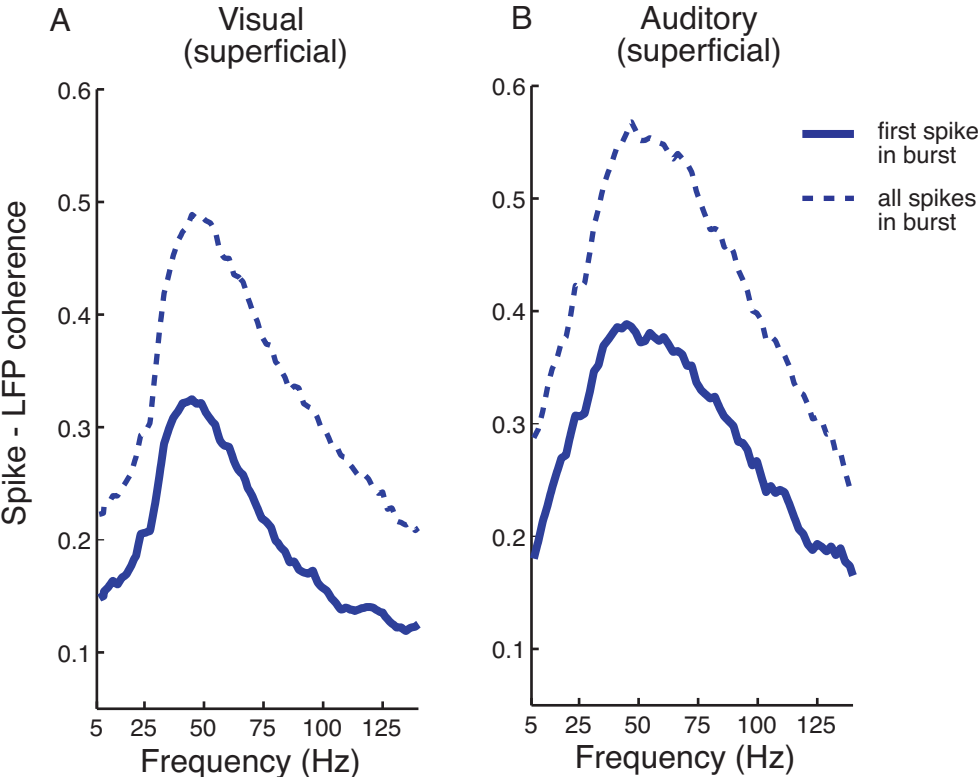

Supplement: supp_00965.2010_figS5.pdf [file supp_00965.2010_figS5.pdf]
